# Supplementary material
Source: publisher site journal article supplement (https://www.dovepress.com/article/250822)
Supplement: Supplementary file 1 [file get_supplementary_file.php]

**Table S1. Details of the molecular analyses used in this study**

| **Tube** | **Target** | **Fusion Type** |
| --- | --- | --- |
| Tube 1  FAM | ALK | EML4 exon13; ALK exon 20 |
| EML4 exon 6 ins33; ALK exon 20 |
| EML4 exon 20; ALK exon 20 |
| EML4 exon 18; ALK exon 20 |
| EML4 exon 2; ALK exon 20 |
| EML4 exon 17; ins68 ALK exon 20 |
| EML4 exon 2; ins117 ALK exon 20 |
| EML4 exon 13; ins69 ALK exon 20 |
| EML4 exon 6; ALK exon 20 |
| EML4 exon 6; ALK exon 19 |
| EML4 exon 6; ins18 ALK exon 20 |
| EML4 exon 20; ins18 ALK exon 20 |
| EML4 exon 17 del58; ins 39 ALK exon 20 |
| EML4 exon 17 ins 65; ALK exon 20 |
| EML4 exon 17; ins 30 ALK exon 20 |
| EML4 exon 17 ins61; ins 34 ALK exon 20 |
| EML4 exon 3; ins53 ALK exon 20 |
| KIF5B exon 24; ALK exon 20 |
| KIF5B exon 17; ALK exon 20 |
| KLC1 exon9; ALK exon20 |
| TFG exon4; ALK exon20 |
| Tube 2  FAM | ROS1 | SLC34A2 exon4; ROS1 exon 32 |
| SLC34A2 exon14 del; ROS1 exon 32 |
| CD74 exon6; ROS1 exon 32 |
| SDC4 exon2; ROS1 exon 32 |
| SDC4 exon4; ROS1 exon 32 |
| SLC34A2 exon4; ROS1 exon 34 |
| SLC34A2 exon14 del; ROS1 exon 34 |
| CD74 exon6; ROS1 exon 34 |
| SDC4 exon4; ROS1 exon 34 |
| EZR exon10; ROS1 exon 34 |
| Tube 3  FAM | ROS1 | TPM3 exon 8; ROS1 exon 35 |
| LRIG3 exon 16; ROS1 exon 35 |
| GOPC exon 8; ROS1 exon 35 |
| Tube 4  FAM | RET | CCDC6 exon 1; RET exon 12 |
| NCOA4 exon6; RET exon 12 |
| KIF5B exon 15; RET exon 12 |
| KIF5B exon 16; RET exon 12 |
| KIF5B exon 23; RET exon 12 |
| KIF5B exon 22; RET exon 12 |

|  | **Exon** | **Mutation name** | **Base change** |
| --- | --- | --- | --- |
| Tube 5  FAM | EGFR exon 19 | E746_A750del (1) | 2235_2249del15 |
| E746_A750del (2) | 2236_2250del15 |
| L747_P753>S | 2240_2257del18 |
| E746_T751>I | 2235_2252>AAT(complex) |
| E746_T751del | 2236_2253del18 |
| E746_T751>A | 2237_2251del15 |
| E746_S752>A | 2237_2254del18 |
| E746_S752>V | 2237_2255>T(complex) |
| E746_S752>D | 2238_2255del18 |
| L747_A750>P | 2238_2248>GC(complex) |
| L747_T751>Q | 2238_2252>GCA(complex) |
| L747_E749del | 2239_2247delTTAAGAGAA |
| L747_T751del | 2239_2253del15 |
| L747_S752del | 2239_2256del18 |
| L747_A750>P | 2239_2248TTAAGAGAAG>C(complex) |
| L747_P753>Q | 2239_2258>CA(complex) |
| L747_T751>S | 2240_2251del12 |
| L747_T751del | 2240_2254del15 |
| L747_T751>P | 2239_2251>C(complex) |
| L747_T751del | 2238_2252del15 |
| L747_S752>Q | 2239_2256>CAA(Complex) |
| L747_A750>P | 2239_2250>CCC(Complex) |
| L747_K754>QL | 2239_2261>CAATT(Complex) |
| E746_K754>EQHL | 2238_2261>GCAACATCT(Complex) |
| L747_S752>Q | 2238_2256>GCAA (Complex) |
| Tube 5  VIC | EGFR exon 20 | S768I | 2303G>T |
| Tube 6  FAM | EGFR exon 21 | L858R | 2573T>G |
| Tube 6  VIC | EGFR exon 18 | G719A | 2156G>C |
| G719S | 2156G>A |
| G719C | 2156G>T |
| Tube 7  FAM | EGFR exon 20 | T790M | 2369C>T |
| Tube 7  VIC | EGFR exon 21 | L861Q | 2582T>A |
| Tube 8  FAM | KRAS exon 2 | G12D | 35G>A |
| G12S | 34G>A |
| Tube 8  VIC | BRAF exon 15 | V600E | 1799T>A |
| V600K | 1798_1799GT>AA(complex) |
| V600E2 | 1799_1800TG>AA (complex) |
| V600R | 1798_1799GT>AG(complex) |
| V600D1 | 1799_1800TG>AC(complex) |
| V600D2 | 1799_1800TG>AT(complex) |
| Tube 9  FAM | KRAS exon 2 | G12A | 35G>C |
| G12V | 35G>T |
| G12R | 34C>T |
| G12C | 34G>T |
| G13C | 37G>T |
| Tube 9  VIC | HER2 exon 20 | A775_G776insYVMA | 2325_2326 ins12 (TACGTGATGGCT) |
| A775_G776insYVMA | 2324_2325 ins12 (ATACGTGATGGC) |
| M774_A775insAYVM | 2322_2323ins12 (GCATACGTGATG) |
| Tube10  FAM | NRAS exon 3 | Q61R | 182A>G |
| Q61K | 181C>A |
| Q61L | 182A>T |
| Q61H | 183A>C |
| Tube10  VIC | HER2 exon 20 | G776>VC | 2326_2327ins3 (TGT) |
| P780_Y781insGSP | 2339_2340 ins9 (TGGCTCCCC) |
| P780_Y781insGSP | 2339_2340ins9 (GGGCTCCCC) |
| P780_Y781insGSP | 2340_2341ins9 (GGCTCCCCA) |
| G776>VC | 2326_2327ins3 (TTT) |
| P780_Y781insGSP | 2339_2340ins9 (CGGCTCCCC) |
| G776>VC | 2326_2327insTAT |
| G776>VC | 2326_2327insTCT |
| G776>LC | 2326G>TTAT |
| Tube11  FAM | EGFR exon 20 | H773_V774insH | 2319_2320insCAC |
| D770_N771insG | 2310_2311insGGT |
| V769_D770insASV | 2307_2308insGCCAGCGTG |
| D770_N771insSVD | 2311_2312insGCGTGGACA |
| V769_D770insASV | 2309_2310AC>CCAGCGTGGAT |
| H773_V774insNPH | 2319_2320insAACCCCCAC |
| H773_V774insQ | 2319_2320insCAG |
| N771_P772insT | 2313_2314insACC |
| N771_P772insH | 2314_2315insACC |
| P772_H773insQ | 2318_2319insACA |
| H773_V774insY | 2319_2320insTAC |
| V769_D770insGSV | 2308_2309insGCAGCGTGG |
| D770_N771insG | 2310_2311insGGG |
| D770_N771insG | 2310_2311insGGC |
| P772_H773insDNP | 2307_2308insGACAACCCC |
| Tube11  VIC | PIK3CA exon 20 | H1047R | 3140A>G |
| PIK3CA exon 9 | E545K | 1633G>A |
